# Supplementary material
Source: PubMed Central journal article supplement (PMC7536641)

**Supplementary Information**  
**Discovery of Isoxazolyl-Based Inhibitors of *Plasmodium falciparum* cGMP-Dependent Protein Kinase**

Shams Ul Mahmood, Huimin Cheng, Sreedhar R. Tummalapalli, Ramappa Chakrasali,  
Rammohan R. Yadav Bheemanaboina, Tamara Kreiss, Agnieszka Chojnowski, Tyler Eck, John  
J. Siekierka, David P. Rotella\*

Table of Contents

- 1) S1-Sx-general experimental details including chemical synthesis and *in vitro* PfPKG assay
- 2) Sy-Sz- proton NMR spectra and mass spectral data for all tested compounds

**General chemical procedures:**

**Compound characterization:** All reagents and solvents were used as received from commercial suppliers. Compounds were analyzed using a UPLC system with a BEH-C<sub>18</sub> column (2.1 cm x 50 mm, 0-100% acetonitrile/water gradient over 6 minutes with UV 254 nm detection) and an LCMS 2020 system (LC<sub>18</sub> 25 cm x 4.6 mm 5 μM column, 0-95% acetonitrile/water gradient over 10 minutes; UV monitor at 220 and 254 nm). Thin layer chromatography was done on silica gel G plates with UV or phosphomolybdic acid detection. Mass spectra were recorded on a CMS system with ESI probe. All of the reported yields are for isolated products and compounds were purified by automated flash chromatography. Proton NMR spectra were obtained at 300 or 400 MHz. All final compounds had purities of at least 95% based on <sup>1</sup>H NMR and UPLC analyses.

**Synthetic Procedures:**

**General route for synthesis of 7 and phenyl substituted derivatives:**

Synthesis of **12** and **13a-c**: See *ACS Med. Chem. Lett.* 2018, **9**, 210-214.

**Oxime formation:** 1 equivalent of aldehyde was stirred at room temperature in methanol (~0.3M) in the presence of 1.1 equivalent of hydroxylamine hydrochloride and 1.5 equivalents of sodium acetate until TLC indicated complete consumption of aldehyde. The reaction mixture was poured over ice to precipitate product that was washed with water and dried.

**Oxime chlorination:** 1 equivalent of oxime was dissolved in DMF (~0.3M) at room temperature in the presence of 1.2 equivalents of recrystallized N-chlorosuccinimide. The reaction was stirred at room temperature until TLC indicated consumption of oxime. The reaction mixture was poured over ice to precipitate a solid that was collected by filtration and dried.

**Pyrimidine acylation:** 4-methyl-2-thiomethylpyrimidine (1 equivalent) was dissolved at room temperature in THF (~0.1M). 1.1 equivalents of ethyl glyoxylate was added, followed by 3 portions over 30 minutes of 1.2 equivalents of potassium t-butoxide. The resulting suspension was stirred at room temperature for 3 hours, then poured into saturated ammonium chloride solution and extracted with 4 portions of ethyl acetate. The collected organic layers were washed with brine, dried and concentrated to provide a yellow solid ketoester that was used without further purification.

Cycloaddition to form **7** and phenyl substituted derivatives: The ketoester above was dissolved at room temperature in absolute ethanol (~0.4M). To this, 1.5 equivalents of the appropriate chloro-oxime and 4 equivalents of triethylamine were added. The solution was stirred at room temperature overnight, poured into water and extracted with four portions of ethyl acetate. The collected organic extracts were washed twice with brine, dried and concentrated. The crude product was purified by silica gel chromatography eluting with an appropriate ethyl acetate-hexanes mixture to furnish the isoxazole ester product.

Oxidation of methyl sulfide to methyl sulfone (e.g. **7** and **10**): Pyrimidinyl methyl sulfide was dissolved at room temperature in a mixture of methanol/distilled water (2:1 ratio, final concentration ~0.2M). Oxone (potassium peroxymonosulfate, 2.2-2.5 equivalents) was added at room temperature and the reaction was stirred overnight. The reaction mixture was poured into water and extracted with 4 portions of ethyl acetate. The collected organic extracts were washed with brine, dried, concentrated and purified by CombiFlash silica gel chromatography eluting with a mixture of ethyl acetate/hexane to provide the desired sulfone as a white solid.

Reduction of isoxazolyl ester to alcohol (e.g. **9**): The isoxazolyl ester cycloaddition product was dissolved in a 2:1 mixture of THF/methanol at room temperature (~0.2M) and cooled to -10°C in an ice-salt bath. Sodium borohydride (2 equivalents) was added in one portion on small scale (less than 3 mmol), or portionwise in 3 batches every 10 minutes (larger than 3 mmol). The reaction was stirred at -10°C until TLC indicated consumption of starting material. The reaction mixture was poured into saturated ammonium chloride solution and extracted with 4 portions of ethyl acetate. Product was isolated by CombiFlash silica gel chromatography eluting with a mixture of ethyl acetate/hexane to provide the desired alcohol as a white solid.

Amine displacement of sulfone (e.g. **19a-d**): The appropriate sulfone (e.g. **18**) was dissolved in reagent grade DMSO (~0.3M) at room temperature. Triethylamine (3 equivalents) were added, followed by 2 equivalents of the desired Boc-protected diamine. The reaction was heated under nitrogen to 65°C overnight. After cooling to room temperature the reaction mixture was poured into brine solution and extracted 4 times with ethyl acetate. The collected organic extracts were washed with brine, dried and concentrated. The desired product was isolated by CombiFlash silica gel chromatography eluting with 5-10% methanol in dichloromethane to furnish pure product.

Conversion of isoxazolyl alcohol to corresponding amine: Dissolve isoxazolyl alcohol in dichloromethane (~0.3M) at room temperature then cool in ice bath. Add 2 equivalents each of triphenylphosphine and carbon tetrabromide at 0°C. Stir at 0°C for 10 minutes then warm to room temperature and stir for 3-5 hours, following by TLC for disappearance of alcohol. Concentrate reaction to dryness and purify by CombiFlash silica gel chromatography eluting with a mixture of ethyl acetate/hexane to afford the desired bromomethyl intermediate. This material was then dissolved at room temperature in acetonitrile (~0.3M) to which 1.2 equivalents of trimethylamine was added, followed by 1.2 equivalents of the appropriate amine. The reaction mixture was stirred at room temperature for 4-6 hours until TLC indicated consumption of the starting bromide. The reaction was concentrated on a rotary evaporator. The resulting crude material was dissolved in a mixture of dichloromethane and saturated sodium bicarbonate. The organic phase was washed with two more portions of saturated bicarbonate, dried and concentrated. The product was purified by CombiFlash silica gel chromatography eluting with 5-10% methanol in dichloromethane to furnish the desired amine product.

Boc-group cleavage and amine acylation (**8**, **9**, **11a-c**, **16a-m**, **19a-d**): The appropriate Boc-protected diamine intermediate was dissolved at room temperature in dichloromethane (~0.3M).

Excess trifluoroacetic acid (at least 5 equivalents) was added at room temperature and the reaction stirred at room temperature until TLC indicated consumption of starting material. The reaction mixture was concentrated on a rotary evaporator to afford a thick oily residue. This material was dissolved in reagent grade DMF at room temperature (~0.2M) to which was added at least 5 equivalents of trimethylamine, followed by 1.3 equivalents of HATU and 1.2 equivalents of the desired carboxylic acid. The reaction was stirred at room temperature overnight. In the morning, the reaction mixture was poured into 5 volumes of water and extracted with 4 portions of ethyl acetate. The collected organic extract was washed with two portions of brine, dried and concentrated. The product was purified by CombiFlash silica gel chromatography eluting with 5-10% methanol in dichloromethane to furnish the desired amine product.

**17a/b:** Amine **15a** was dissolved in dichloromethane at room temperature (0.1M) to which was added 2 equivalents of each aldehyde, followed by 3 equivalents of sodium triacetoxyborohydride and two drops of acetic acid. After stirring overnight at room temperature, the reaction was concentrated by rotary evaporation. The residue was dissolved in ethyl acetate and washed twice with saturated sodium bicarbonate and brine. The organic layer was dried and concentrated and the desired products isolated by CombiFlash silica gel chromatography eluting with 10% methanol in dichloromethane to furnish the desired amine product.

**17c:** 30 mg (0.07 mmol) of amine **15a** was dissolved in 2 ml dichloromethane at 0°C. 1.2 equivalents (15.3 mg) of pyrazole sulfonyl chloride was added, followed by 29  $\mu$ l (21 mg, 0.21 mmol, 3 equivalents) trimethylamine. The reaction was stirred in an ice bath for 10 minutes, then diluted with 10 ml dichloromethane. The mixture was extracted with two portions of 1N aqueous HCl and brine, dried and concentrated. The desired product was isolated by CombiFlash silica gel chromatography eluting with 5% methanol in dichloromethane.

#### **PfPKG assay procedure:**

PfPKG kinase activity was assayed as described<sup>7</sup> using the commercial immobilized metal ion affinity-based fluorescence polarization (IMAP) assay (Molecular Devices, San Jose, CA.). Briefly, at room temperature the kinase solution was preincubated with inhibitor at various concentrations for 15 minutes. The kinase assays (20  $\mu$ l) contained 10 mM Tris-HCl, pH 7.2, 10 mM MgCl<sub>2</sub>, 0.05% NaN<sub>3</sub>, 0.01% Tween@20 (RB-T) and 17 ng of recombinant PfPKG. Reactions were initiated with addition of 24 nM fluorescent substrate (FAM-PKAtide) with 10  $\mu$ M ATP, 1  $\mu$ M cGMP, 1.0 mM DTT prepared in RB-T. Following a 1 hour incubation, 60  $\mu$ L of the PBR mixture (Progressive Binding Reagent (PBR) mixture was made according to the commercial protocol for FAM-PKAtide substrate. 1X IMAP Progressive Binding Buffer A, Progressive Binding Reagent diluted 400-fold) was added and incubated for 30 minutes. Fluorescent polarization was read in parallel and perpendicular with an excitation wavelength of 485 nm and an emission wavelength of 528 nm using a Synergy 2 Microplate reader (BioTek, Winooski, VT). The data was analyzed using four parameter logistic curve using Microsoft Excel Solver and dose response curves were generated using Microsoft Excel.

#### **Compound characterization data**

MSU-HC-1-027H

- 8.791
- 8.774
- 8.637
- 8.607
- 8.139
- 8.129
- 8.117
- 7.517
- 7.509
- 7.501
- 7.497
- 7.488
- 7.486
- 7.473
- 7.461
- 7.260
- 6.281
- 6.268
- 4.852
- 4.834
- 4.826
- 4.582
- 4.572
- 4.132
- 4.114
- 4.097
- 4.079
- 3.918
- 3.904
- 3.861
- 3.841
- 3.829
- 3.780
- 3.767
- 3.758
- 3.735
- 3.721
- 3.621
- 2.359
- 2.032
- 1.391
- 1.262
- 1.244
- 1.227

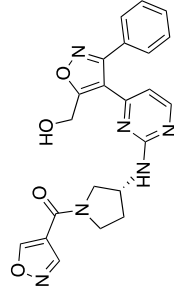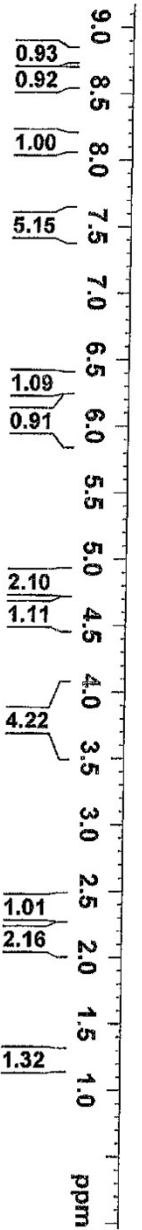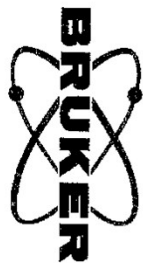

Current Data Parameters  
 NAME MSU-HC-1-027H  
 EXPNO 1  
 PROCNO 4

F2 - Acquisition Parameters  
 Date\_ 20180214  
 Time\_ 8.40  
 INSTRUM AV400  
 PROBHD 5 mm ZABBO BB/  
 PULPROG zg30  
 TD 65536  
 SOLVENT CDCl3  
 NS 8  
 DS 2  
 SWH 8012.820 Hz  
 FIDRES 0.122266 Hz  
 AQ 4.0894465 sec  
 RG 287  
 DW 62.400 usec  
 DE 6.50 usec  
 TE 294.4 K  
 D1 1.00000000 sec  
 FID0 1

CHANNEL f1  
 SF01 400.3324722 MHz  
 NUC1 1H  
 P1 9.00 usec  
 P1M1 10.80000019 W

F2 - Processing parameters  
 SI 65536  
 SF 400.3300083 MHz  
 WDW EM  
 SSB 0  
 LB 0.30 Hz  
 GB 0  
 PC 1.00

MSU-HC-1-030H

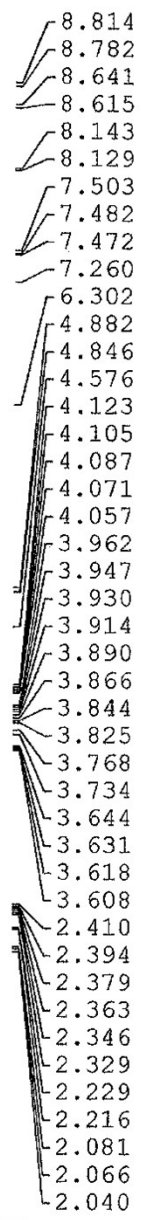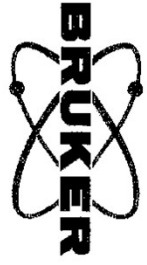

Current Data Parameters  
 NAME MSU-HC-1-030H  
 EXPNO 1  
 PROCNO 4

F2 - Acquisition Parameters

Date\_ 20180302  
 Time\_ 9.43  
 INSTRUM AV400  
 PROBHD 5 mm PABBO BBI  
 PULPROG zg30  
 TD 65536  
 SOLVENT CDCl3  
 NS 8  
 DS 2  
 SWH 8012.820 Hz  
 FIDRES 0.122266 Hz  
 AQ 4.0894465 sec  
 RG 456  
 DW 62.400 usec  
 DE 6.50 usec  
 TE 294.4 K  
 D1 1.00000000 sec  
 TD0 1

CHANNEL f1  
 SFO1 400.3324722 MHz  
 NUC1 1H  
 P1 9.00 usec  
 PLW1 10.80000019 W

F2 - Processing parameters  
 SI 65536  
 SF 400.3300083 MHz  
 MIDW EM  
 SSB 0  
 LB 0.30 Hz  
 GB 0  
 PC 1.00

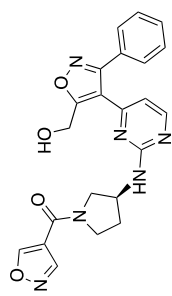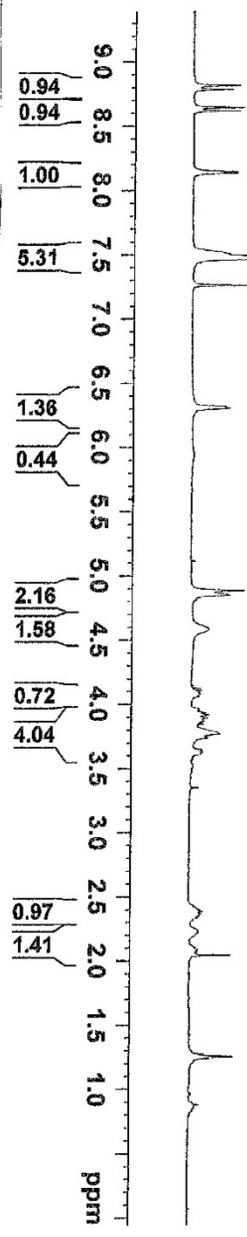

MSU-HC-1-037Ha

- 9.057
- 8.995
- 8.588
- 8.559
- 8.063
- 8.054
- 8.050
- 8.041
- 7.931
- 7.399
- 7.389
- 7.384
- 7.378
- 7.364
- 7.356
- 7.352
- 7.347
- 7.343
- 7.335
- 7.326
- 6.189
- 6.177
- 4.811
- 4.802
- 4.760
- 4.730
- 3.969
- 3.951
- 3.933
- 3.915
- 3.765
- 3.310
- 3.294
- 3.163
- 3.159
- 3.154
- 3.150
- 3.146
- 1.963
- 1.954
- 1.857
- 1.101
- 1.083
- 1.065

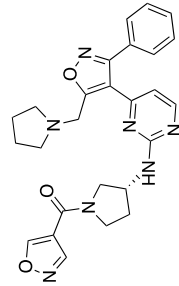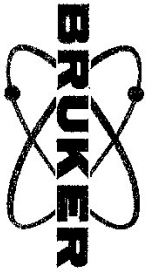

Current Data Parameters  
 NAME MSU-HC-1-037Ha  
 EXPNO 1  
 PROCNO 1

F2 - Acquisition Parameters  
 Date\_ 20180326  
 Time 14.48  
 INSTRUM AV400  
 PROBHD 5 mm PABBO BB/  
 PULPROG zg30  
 TD 65536  
 SOLVENT MeOD  
 NS 8  
 DS 2  
 SWH 8012.820 Hz  
 FIDRES 0.122286 Hz  
 AQ 4.0894465 sec  
 RG 456  
 DW 62.400 usec  
 DE 6.50 usec  
 TE 294.4 K  
 D1 1.00000000 sec  
 TD0 1

==== CHANNEL F1 =====  
 SFO1 400.3324722 MHz  
 NUCL1 1H  
 P1 9.00 usec  
 PLW1 10.80000019 W  
 =====  
 F2 - Processing parameters  
 SI 65536  
 SF 400.330062 MHz  
 WDW EM  
 SSB 0  
 LB 0.30 Hz  
 GB 0  
 PC 1.00

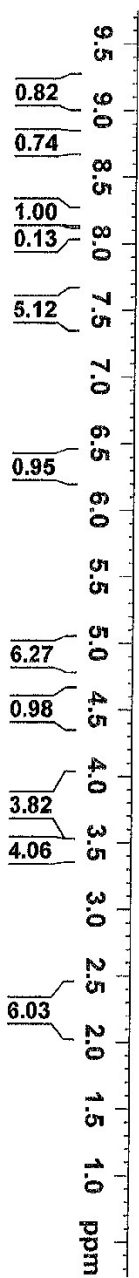

MSU-HC-1-037Hp

- 9.228
- 9.161
- 9.137
- 8.747
- 8.716
- 8.226
- 8.225
- 8.221
- 8.214
- 8.211
- 8.087
- 7.503
- 7.498
- 7.487
- 7.473
- 7.469
- 7.458
- 7.452
- 7.441
- 4.891
- 3.317
- 3.313
- 3.309
- 3.305
- 3.301
- 2.784
- 2.012
- 1.306
- 1.288
- 1.238
- 1.220
- 1.139
- 1.121
- 1.111
- 1.103
- 1.092
- 1.074
- 0.986
- 0.970
- 0.917
- 0.901
- 0.896
- 0.883
- 0.877

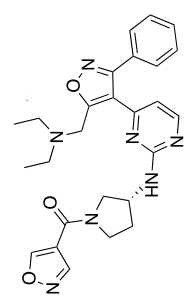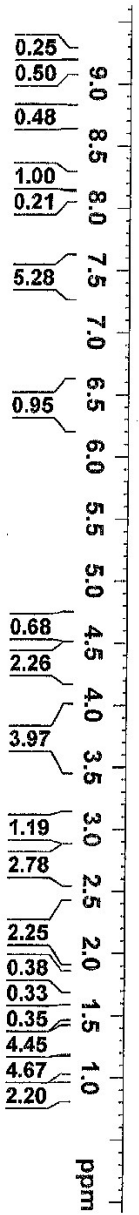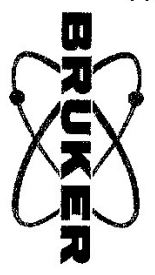

Current Data Parameters  
 NAME MSU-HC-1-037Hp  
 EXPNO 1  
 PROCNO 1

F2 - Acquisition Parameters  
 Date\_ 20180326  
 Time\_ 14.59  
 INSTRUM AT400  
 PROBRD 5 mm PABBO BB/  
 PULPROG zg30  
 TD 65536  
 SOLVENT MeOD  
 NS 8  
 DS 2  
 SWH 8012.820 Hz  
 FIDRES 0.122266 Hz  
 AQ 4.0894465 sec  
 RG 456  
 DW 62.400 usec  
 DE 4.50 usec  
 TE 284.2 K  
 D1 1.00000000 sec  
 TDO 1

CHANNEL f1  
 SFO1 400.3324722 MHz  
 NUCL1 1H  
 P1 9.00 usec  
 P1M1 10.80000019 W

F2 - Processing parameters  
 SI 65536  
 SF 400.3300061 MHz  
 WDM EM  
 SSB 0  
 IB 0.30 Hz  
 GB 0  
 PC 1.00

MSU-HC-1-079a

- 8.216
- 8.189
- 8.169
- 7.683
- 7.663
- 7.531
- 7.508
- 7.478
- 7.450
- 7.412
- 7.385
- 7.315
- 7.305
- 6.744
- 6.720
- 6.382
- 4.846
- 4.775
- 4.736
- 4.685
- 4.453
- 4.163
- 4.070
- 4.005
- 3.870
- 3.791
- 3.692
- 3.622
- 3.597
- 3.300
- 3.152
- 2.247
- 2.050
- 1.257
- 1.239

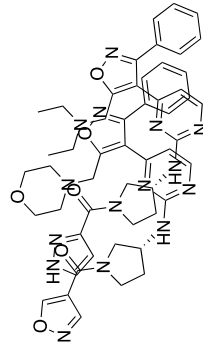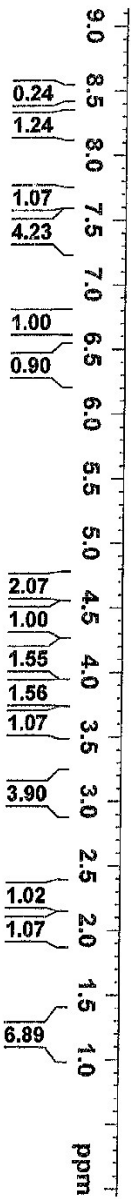

Current Data Parameters  
 NAME MSU-HC-1-079a  
 EXNO 1  
 PROCNO 1

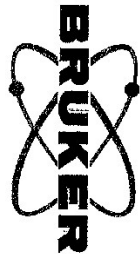

F2 - Acquisition Parameters  
 Date\_ 20180716  
 Time 16.21  
 INSTRUM AV400  
 PROBHD 5 mm PABBO BBI  
 PULPROG zg30  
 TD 65536  
 SOLVENT MeOD  
 NS 8  
 DS 2  
 SWH 8012.820 Hz  
 FIDRES 0.122266 Hz  
 AQ 4.0894465 sec  
 RG 228  
 DW 62.400 usec  
 DE 6.50 usec  
 TE 297.7 K  
 D1 1.0000000 sec  
 TDO 1

===== CHANNEL f1 =====  
 SFO1 400.3324723 MHz  
 NUCL1 1H  
 P1 9.00 usec  
 PLMT1 10.80000019 W  
 F2 - Processing parameters  
 SI 65536  
 SF 400.3300098 MHz  
 NDM EM  
 SSB 0  
 LB 0.30 Hz  
 GB 0  
 PC 1.00



MSU-HC-1-079b

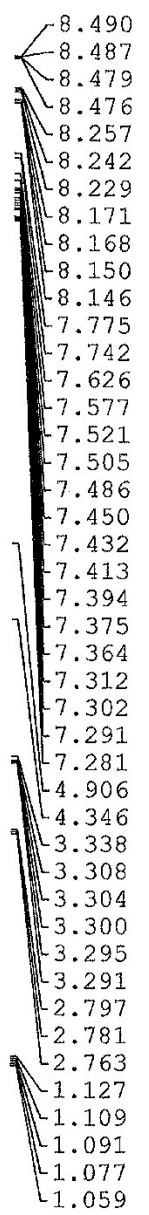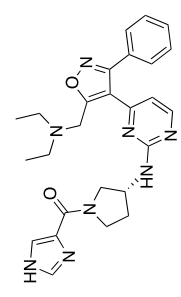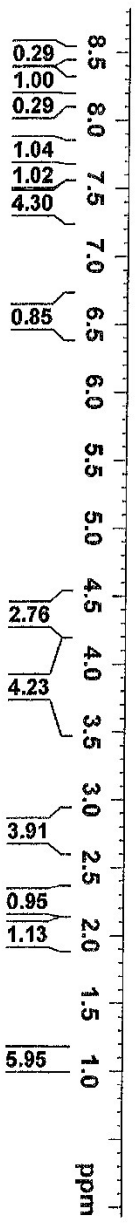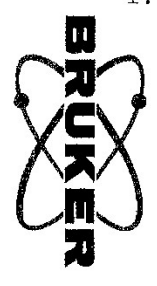

Current Data Parameters  
 NAME MSU-HC-1-079b  
 EXPNO 1  
 PROCNO 1

F2 - Acquisition Parameters  
 Date\_ 20180719  
 Time\_ 12.29  
 INSTRUM AV400  
 PROBRD 5 mm PABBO BB/  
 PULPROG zg30  
 TD 65536  
 SOLVENT MeOD  
 NS 8  
 DS 2  
 SWH 8012.820 Hz  
 FIDRES 0.122266 Hz  
 AQ 4.0894465 sec  
 RG 287  
 DW 62.400 usec  
 DE 6.50 usec  
 TE 293.4 K  
 D1 1.00000000 sec  
 TD0 1

==== CHANNEL f1 =====  
 SFO1 400.3324722 MHz  
 NUC1 1H  
 P1 9.00 usec  
 PLM1 10.80000019 M

F2 - Processing parameters  
 SI 65536  
 SF 400.3300100 MHz  
 WDW EM  
 SSB 0  
 LB 0.30 Hz  
 GB 0  
 PC 1.00



MSU-HC-1-079d

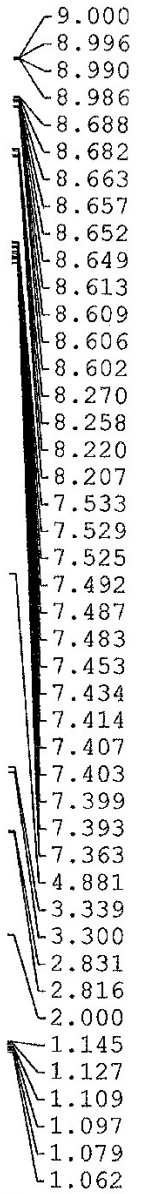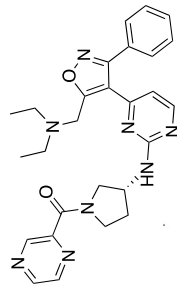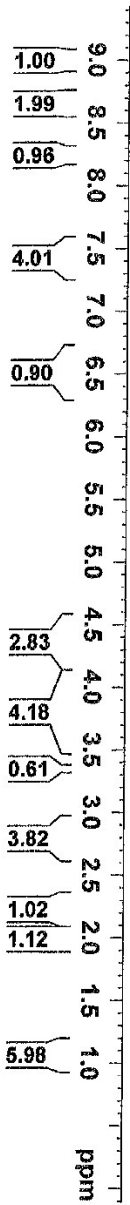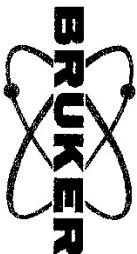

Current Data Parameters  
 NAME MSU-HC-1-079d  
 EXPNO 1  
 PROCNO 1

F2 - Acquisition Parameters  
 Date\_ 20180719  
 Time 12.50  
 INSTRUM AV400  
 PROBHD 5 mm PABBO BB/  
 PULPROG zg30  
 TD 65536  
 ID MeOD  
 SOLVENT MeOD  
 NS 8  
 DS 2

SWH 8012.820 Hz  
 FIDRES 0.122266 Hz  
 AQ 4.0894465 sec  
 RG 203  
 DW 62.400 usec  
 DE 6.50 usec  
 TE 293.4 K  
 D1 1.00000000 sec  
 TD0 1

===== CHANNEL f1 =====  
 SFO1 400.3324722 MHz  
 NUC1 1H  
 P1 9.00 usec  
 PLW1 10.80000019 W

F2 - Processing parameters  
 SI 65536  
 SF 400.3300100 MHz  
 WDW EM  
 SSB 0  
 LB 0.30 Hz  
 GB 0  
 PC 1.00

MSU-HC-1-084

9.074  
8.679  
8.275  
8.263  
8.237  
8.224  
7.548  
7.534  
7.519  
7.472  
7.457  
7.453  
7.438  
7.432  
7.420  
7.401  
6.442  
6.369  
4.913  
4.805  
4.722  
4.594  
4.425  
4.331  
4.089  
4.072  
4.054  
3.303  
3.299  
3.296  
3.215  
3.141  
1.289  
1.272  
1.256  
1.241  
1.223

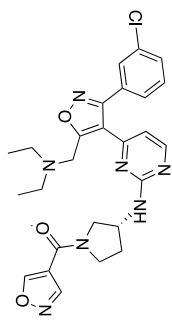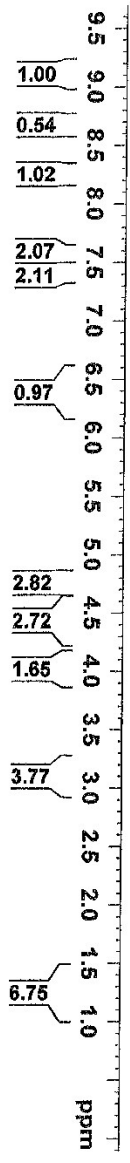

Current Data Parameters  
NAME MSU-HC-1-084  
EXNO 1  
PROCNO 1

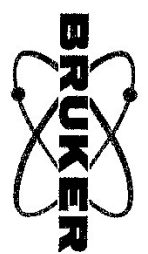

F2 - Acquisition Parameters  
Date\_ 20180810  
Time\_ 12.08  
INSTRUM AV400  
PROBHD 5 mm PABBO BB/  
PULPROG zg30  
TD 65536  
SOLVENT MeOD  
NS 8  
DS 2  
SWH 8012.820 Hz  
FIDRES 0.122266 Hz  
AQ 4.089465 sec  
RG 181  
DM 62.400 usec  
DE 6.50 usec  
TE 291.5 K  
D1 1.00000000 sec  
TDO 1

CHANNEL f1  
SFO1 400.324722 MHz  
NUC1 1H  
P1 9.00 usec  
PLW1 10.80000019 W

F2 - Processing parameters  
SI 65536  
SF 400.3300104 MHz  
WDW EM  
SSB 0  
CB 0.30 Hz  
GB 0  
PC 1.00

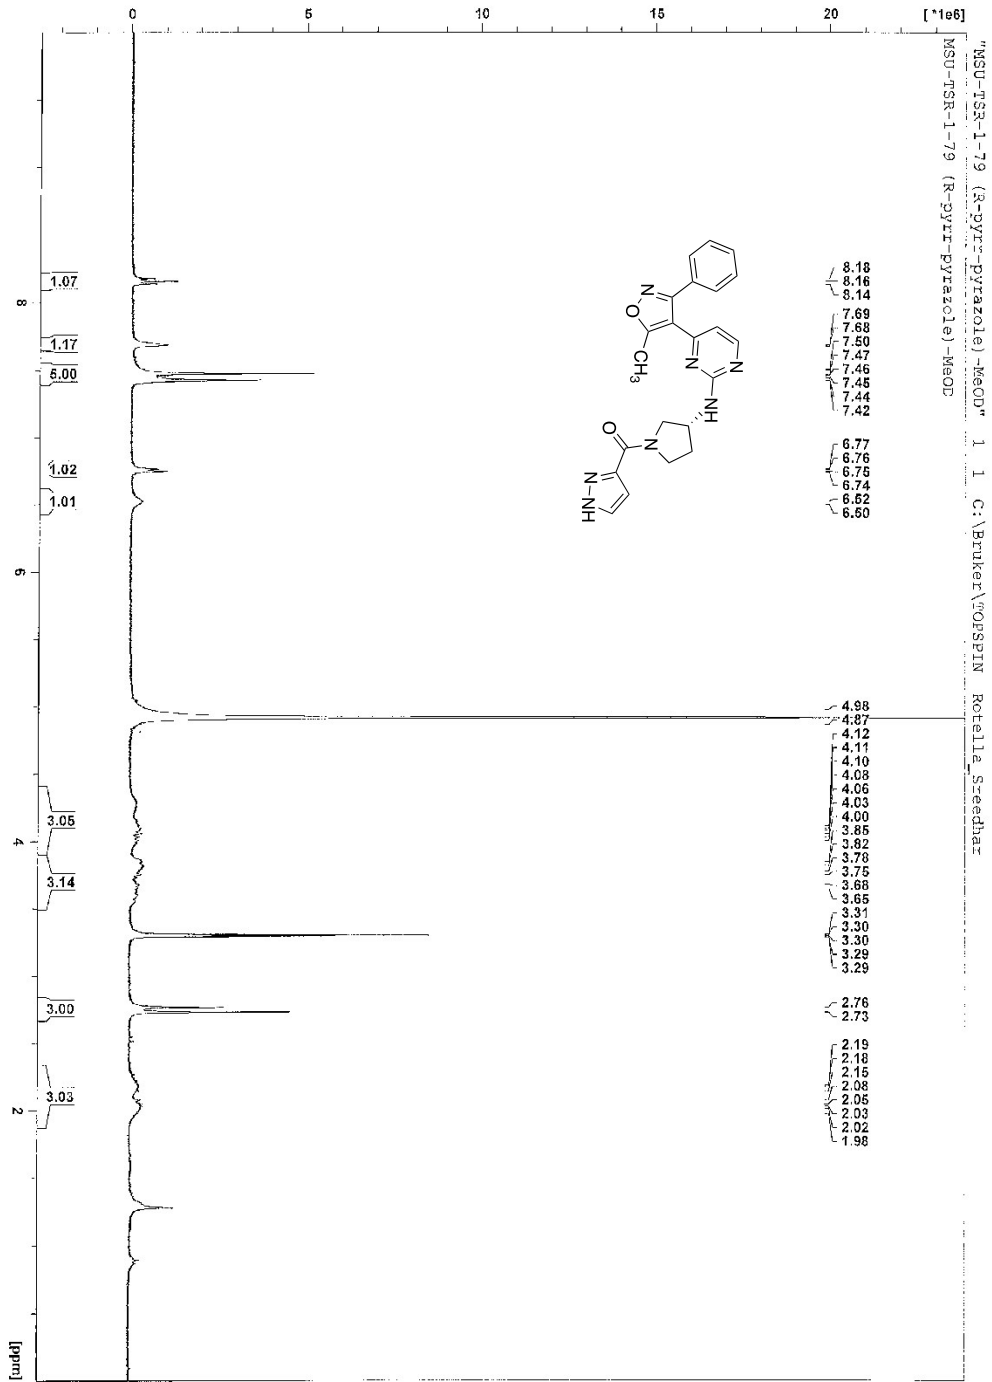

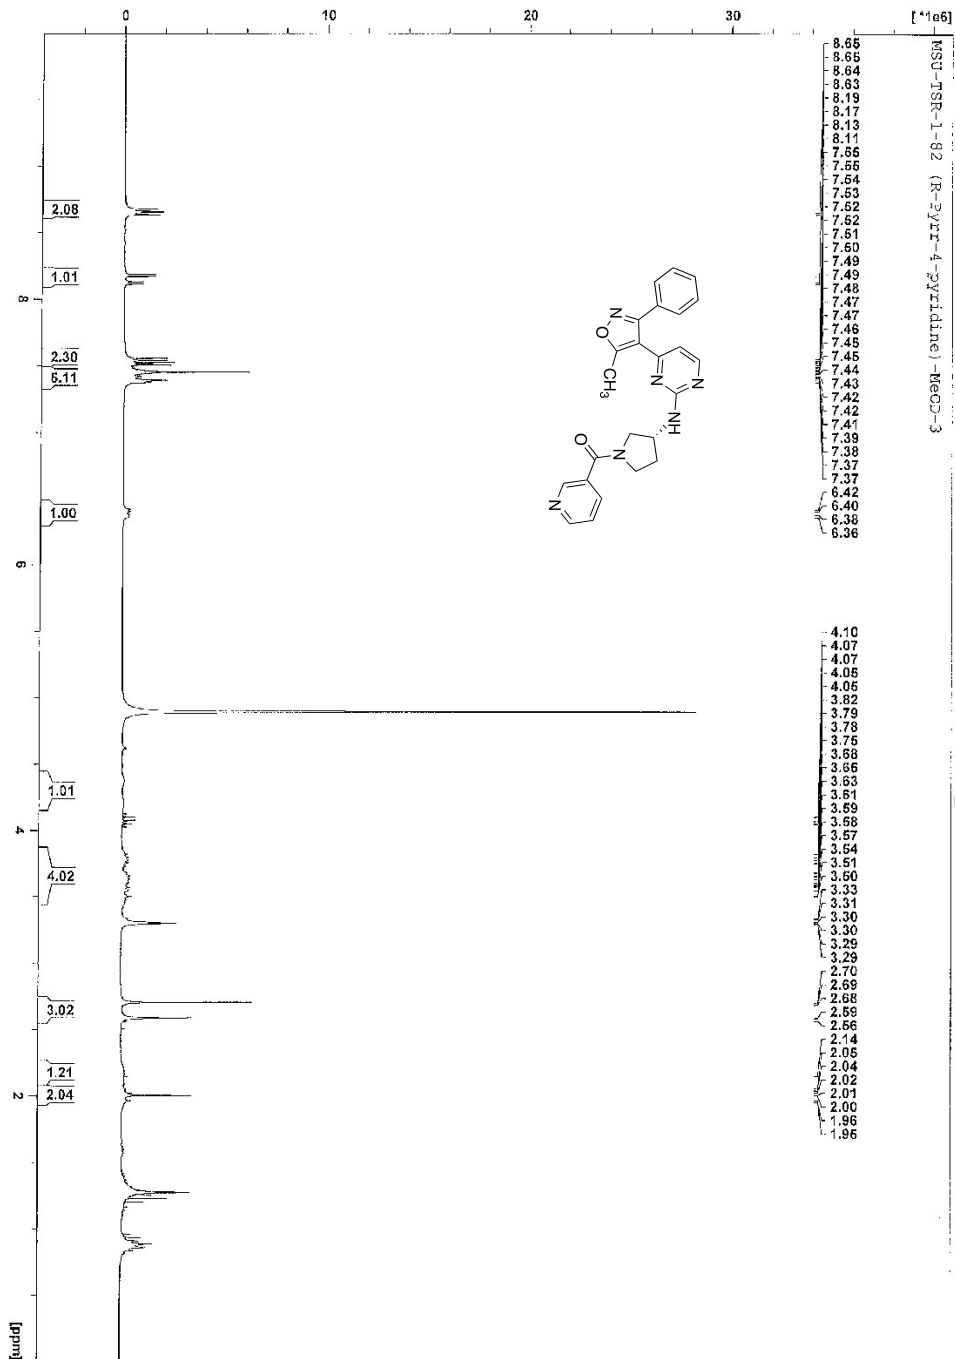

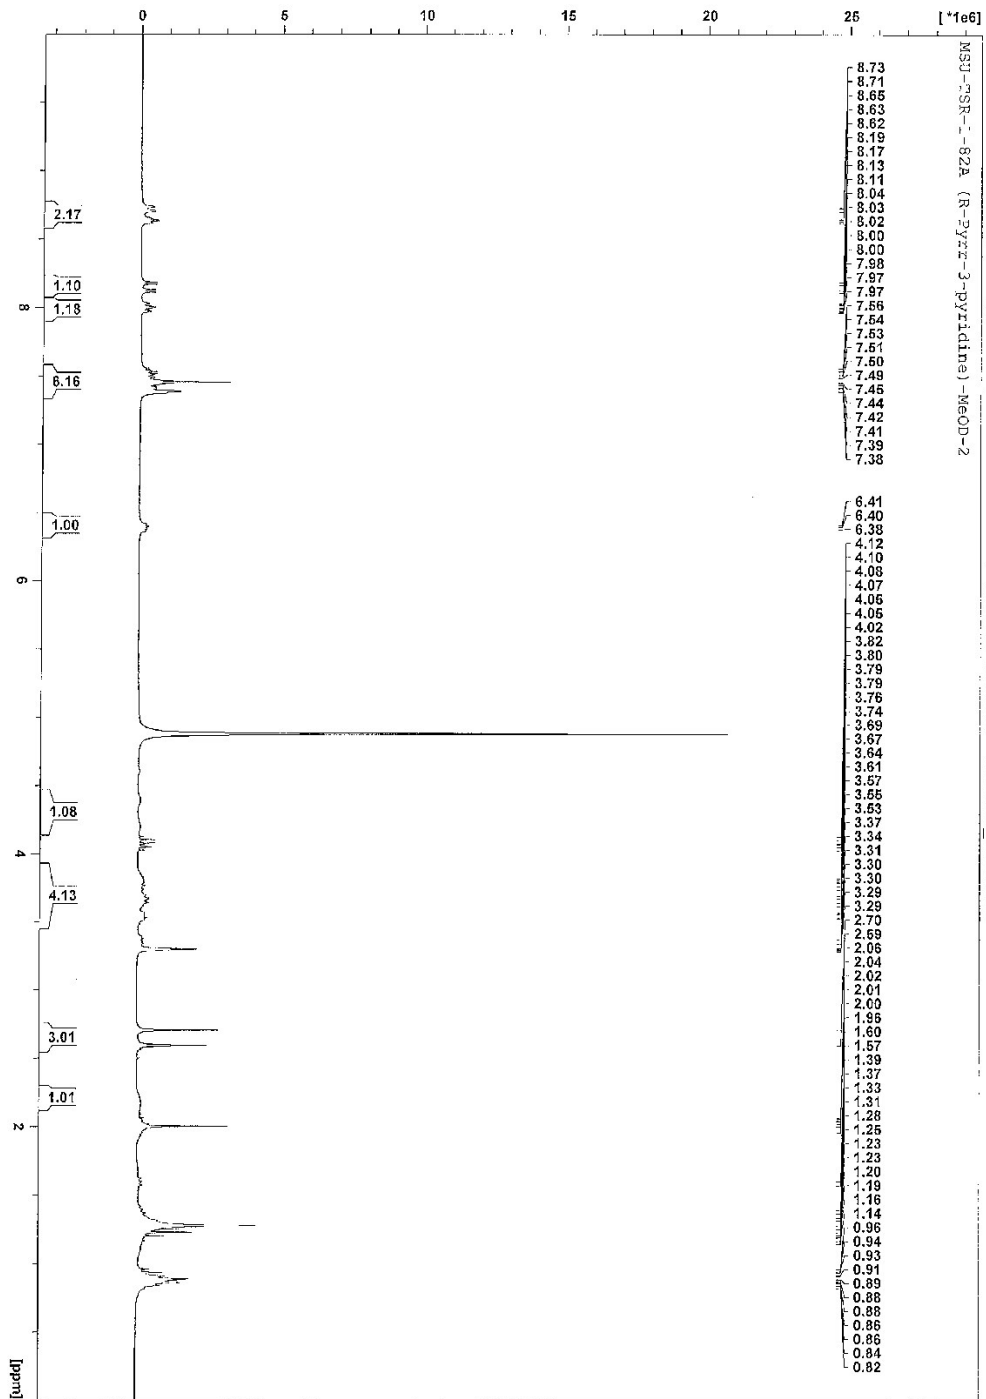

## ==== Shimadzu LabSolutions Data Report ====

## &lt;Spectrum&gt;

Line#:1 R.Time:8.408(Scan#:5026)  
MassPeaks:85  
RawMode:Single 8.408(5026) BasePeak:447(1383896)  
BG Mode:None Segment 1 - Event 1

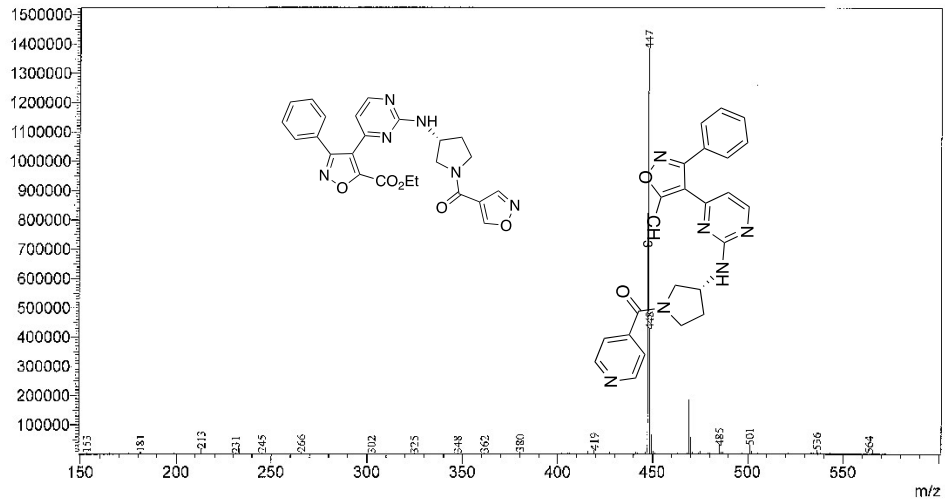



MSU-HC-1-027

9/5/2019 5:14:06 PM Page 1 / 1

==== Shimadzu LabSolutions Data Report ====

<Spectrum>

Line#:1 R.Time:6.638(Scan#:3964)  
MassPeaks:63  
RawMode:Single 6.638(3964) BasePeak:433(368663)  
BG Mode:None Segment 1 - Event 1

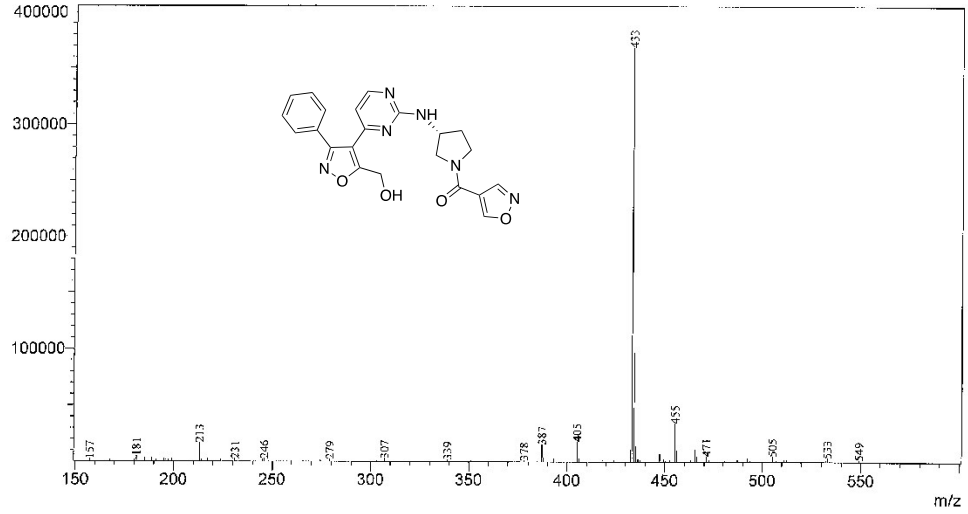

MSU-HC-1-030

9/5/2019 5:33:00 PM Page 1 / 1

==== Shimadzu LabSolutions Data Report ====

<Spectrum>

Line# 1 R. Time: 8.028 (Scan#: 4798)  
Mass Peaks: 105  
Raw Mode: Single 8.028 (4798) Base Peak: 433 (641222)  
BG Mode: None Segment 1 - Event 1

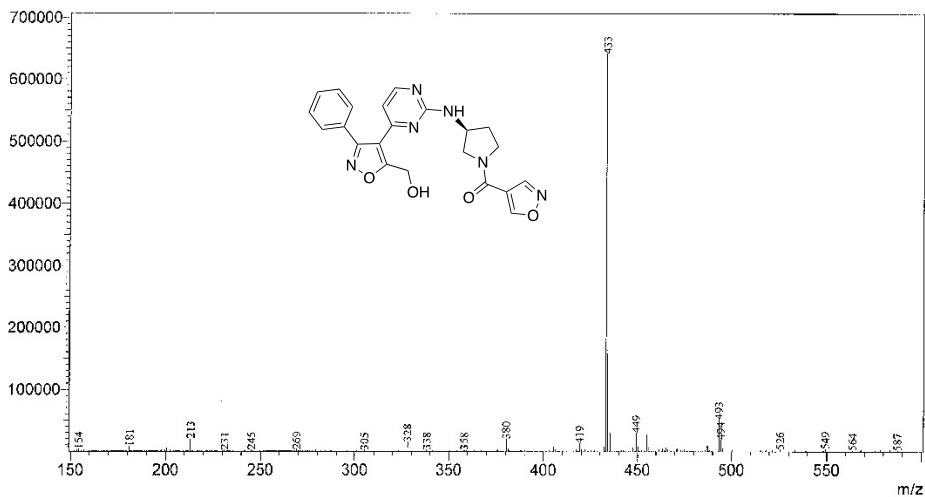

## ==== Shimadzu LabSolutions Data Report ====

## &lt;Spectrum&gt;

Line#:1 R.Time:3.327(Scan#:1977)  
MassPeaks:93  
RawMode:Single 3.327(1977) BasePeak:521(1104647)  
BG Mode:None Segment 1 - Event 1

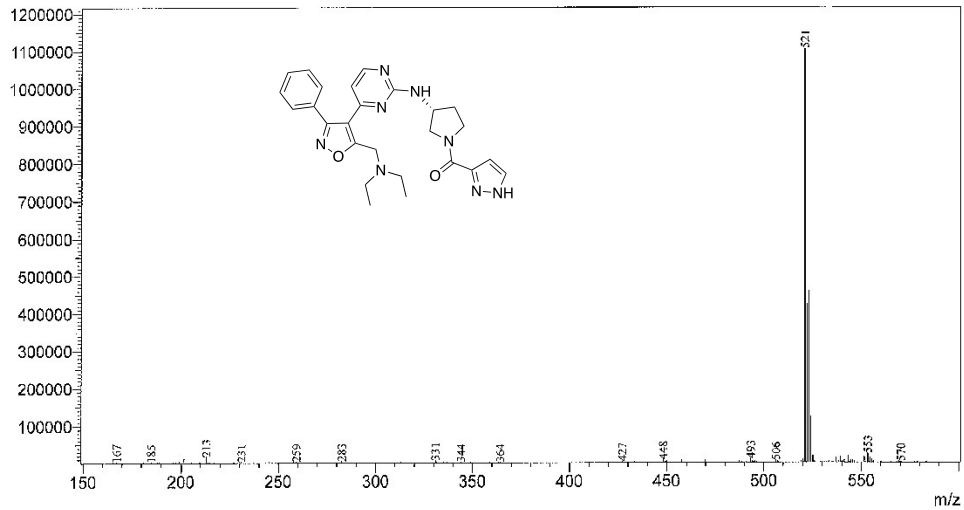

MSU-#10-1-079b

9/5/2019 4:28:06 PM Page 1 / 1

==== Shimadzu LabSolutions Data Report ====

<Spectrum>

Line#: 1 R.Time: 4.402(Scan#: 2622)  
Mass Peaks: 125  
Raw Mode: Single 4.402(2622) Base Peak: 521(1174467)  
BG Mode: None Segment 1 - Event 1

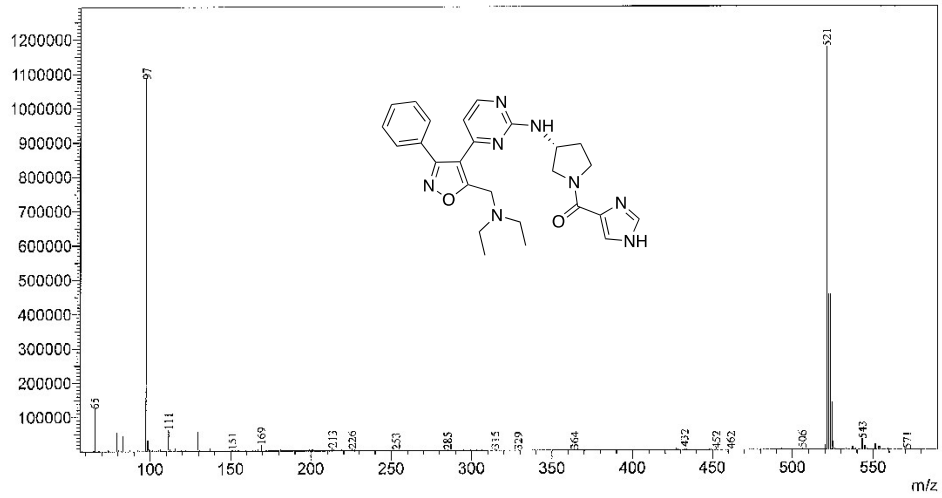

MSU-HC-1-79d

9/5/2019 4:48:26 PM Page 1 / 1

==== Shimadzu LabSolutions Data Report ====

<Spectrum>

Line#:1 R.Time:4.580(Scan#:-)---)  
MassPeaks:82  
RawMode:Averaged 4.578-4.582(2728-2730) BasePeak:533(855968)  
BG Mode:Calc Segment 1 - Event 1

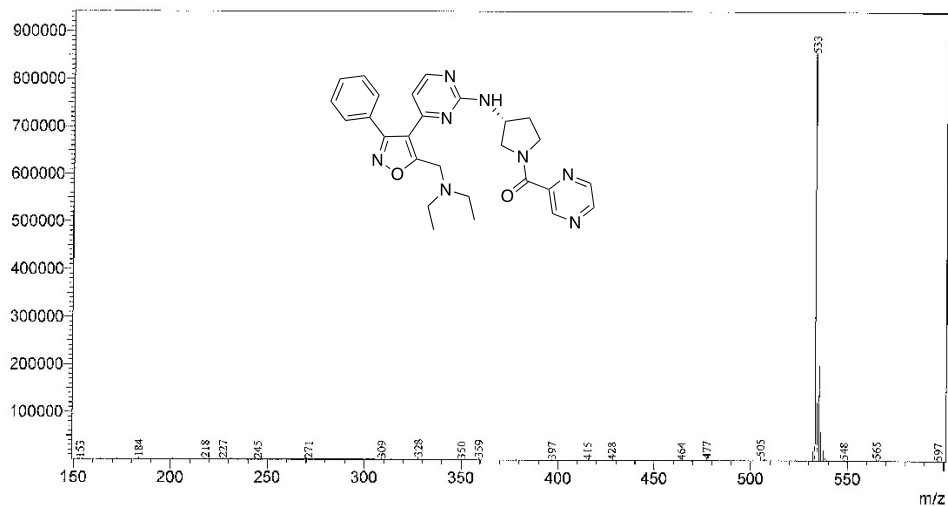

MSU-110-1-084

==== Shimadzu LabSolutions Data Report ====

<Spectrum>

Line#: 1 R.Time: 5.572(Scan#: 3324)  
MassPeaks: 117  
RawMode: Single 5.572(3324) BasePeak: 474(6950175)  
BG Mode: None Segment 1 - Event 1

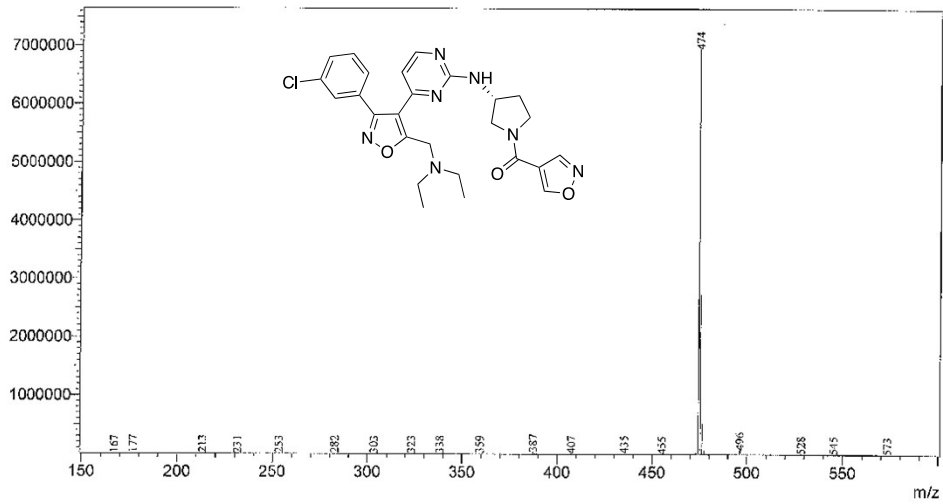

1100-119-1-002

==== Shimadzu LabSolutions Data Report ====

<Spectrum>

Line#: 1 R.Time: 6.430(Scan#: 3839)  
MassPeaks: 92  
RawMode: Single 6.430(3839) BasePeak: 427(1038474)  
BG Mode: None Segment 1 - Event 1

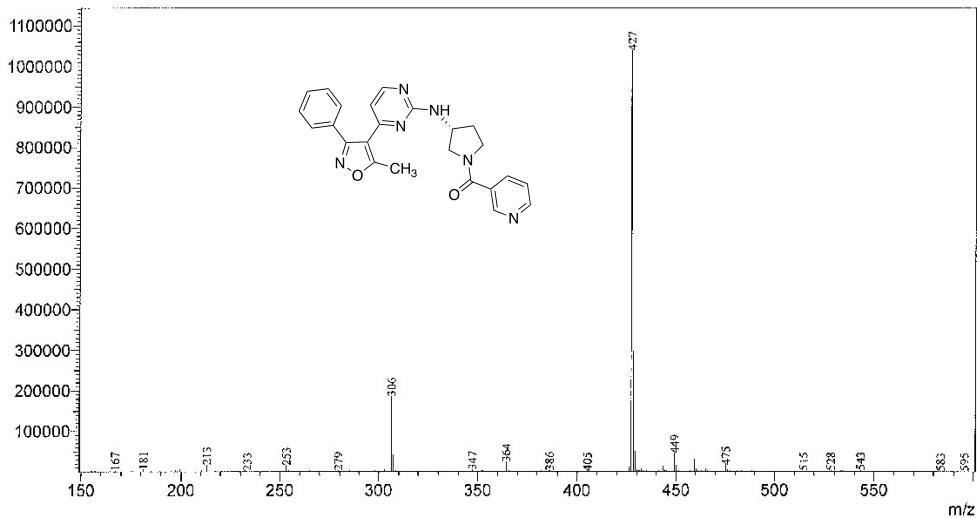

MSU-TQ-1-CR2A

==== Shimadzu LabSolutions Data Report ====

<Spectrum>

Line# 1 R.Time:7.010(Scan#:4187)  
MassPeaks:68  
RawMode:Single 7.010(4187) BasePeak:213(42284)  
BG Mode:None Segment 1 - Event 1

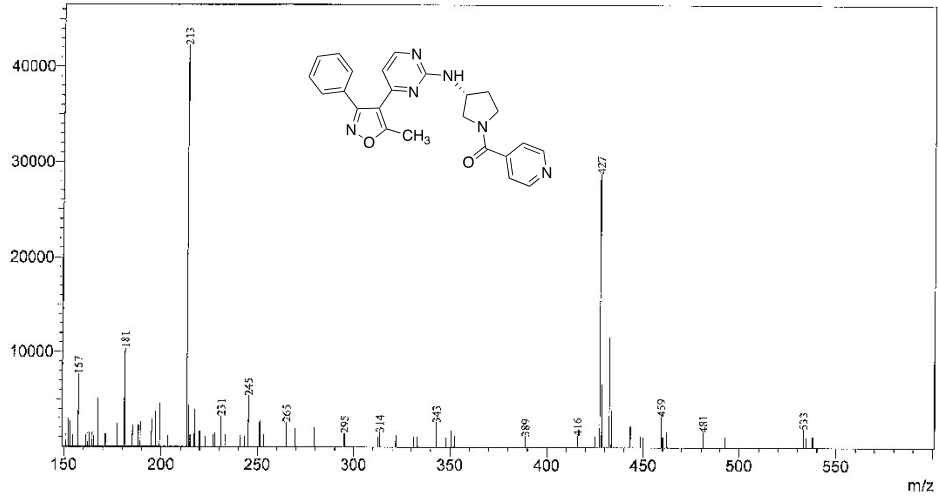

Supplement: MD-011-C9MD00511K-s001.pdf [file MD-011-C9MD00511K-s001.pdf]
